# Supplementary material for: Favipiravir Treatment Prolongs Survival in a Lethal BALB/c Mouse Model of Ebinur Lake Virus Infection
Source: MDPI journal article supplement (doi:10.3390/v16040631), 2024-04-18
Supplement: s1 [file s1]

## Supplementary data

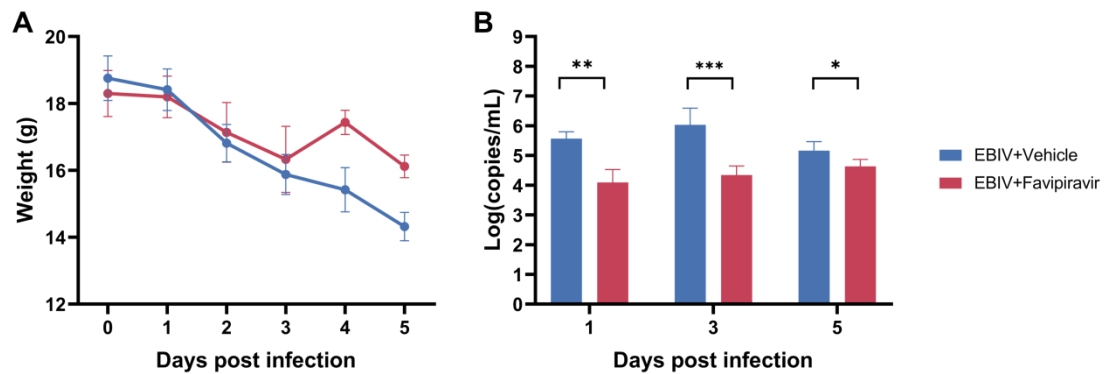

**Figure S1. Body weight changes and viral copies on 1, 3, and 5 dpi of EBIV-infected BALB/c mice treated with vehicle or Favipiravir.** Fifteen mice in each group were infected intraperitoneally with 10 PFU EBIV and treated intraperitoneally with vehicle or favipiravir. The treatment (administrated every 12 h) began at 2 days prior to EBIV infection and continued until 5 dpi. The weight data are represented as the group mean and standard error (A). The EBIV RNA load on 1, 3 and 5 dpi in the serum were determined by qRT-PCR (B). Asterisks denote significant differences (\*:  $P < 0.5$ , \*\*:  $P < 0.01$  \*\*\*:  $p < 0.001$ ).

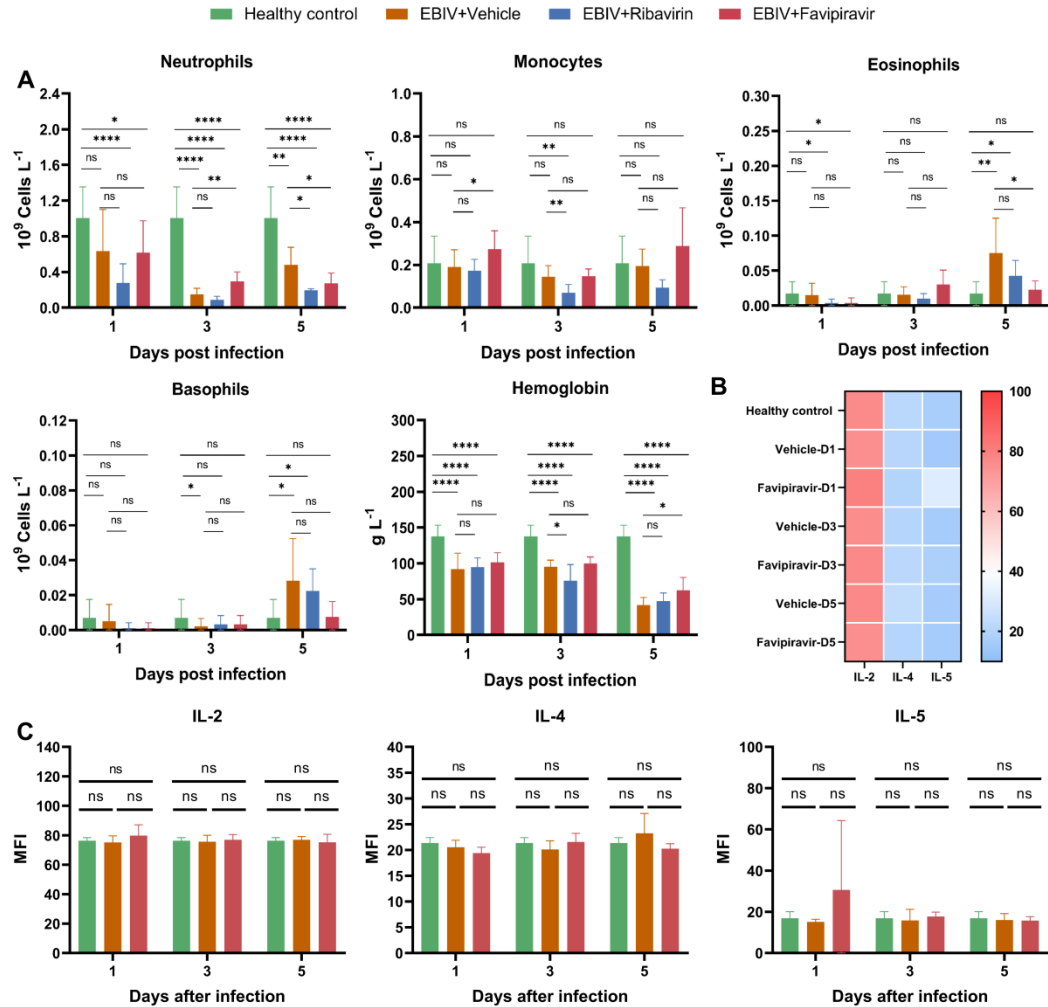

**Figure S2. Hematologic and cytokine analysis on 1, 3, and 5 dpi in EBIV-infected mice with and without treatment.** Mice in each group were infected intraperitoneally with 10 PFU EBIV and treated intraperitoneally with vehicle, ribavirin or favipiravir. The treatment (administrated every 12 h) began at 2 days prior to virus infection and continued until the death or the body weight dropped by 25%. Healthy control showed the results using the blood samples collected from BALB/c mice without EBIV infection. The count of (A) Neutrophils; Monocytes; Eosinophils; Basophils and Hemoglobin (Hb); (B, C) The level of cytokines on 1, 3 and 5 dpi in EBIV infected BALB/c mice were shown. (\*:  $p < 0.05$ , \*\*:  $p < 0.01$ , \*\*\*:  $p < 0.001$ , \*\*\*\*:  $p < 0.0001$ , ns: no significant difference).

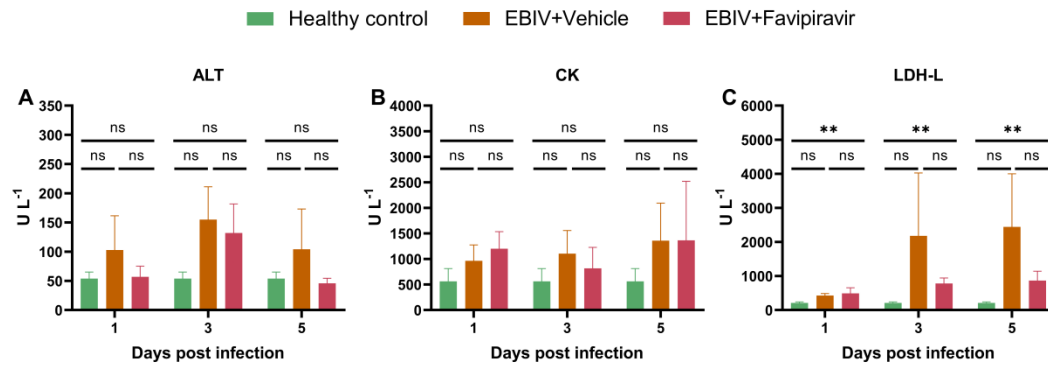

**Figure S3. Blood chemistry analysis on 1, 3, and 5 dpi in EBIV-infected mice treated with favipiravir.** Fifteen mice in each group were infected intraperitoneally with 10 PFU EBIV and treated intraperitoneally with vehicle or favipiravir. The treatment (administrated every 12 h) began at 2 days prior to virus infection and continued until 5 dpi. Five mice in each group were randomly sacrificed at 1, 3, and 5 dpi, respectively, and 5 healthy mice were also sacrificed to serve as healthy controls. ( \*\*: p < 0.01, ns: no significant difference).
